# Supplementary material
Source: MDPI journal article supplement (https://www.mdpi.com/2071-1050/9/5/850)
Supplement: s1 [file s1]

**Table S2.** Maximum value estimates for 22 ecosystem services across 13 biomes (in Int.\$/ha/year, 2007 price levels (2009 price levels for [82]))\*

| Ecosystem Services            | Open oceans      | Coral reefs                  | Coastal systems            | Coastal wetlands              | Inland wetlands            | Lakes and Rivers (Freshwater) | Tropical forests        | Temperate and boreal forests | Woodlands         | Grasslands            | Cropland     | Urban        |
|-------------------------------|------------------|------------------------------|----------------------------|-------------------------------|----------------------------|-------------------------------|-------------------------|------------------------------|-------------------|-----------------------|--------------|--------------|
| <b>Provisioning</b>           | 22<br>102<br>106 | 20,892<br>55,724<br>57,953   | 7,549<br>2,396<br>2,492    | 8,289<br>2,998<br>3,117       | 9,709<br>1,659<br>1,726    | 5,776<br>1,914<br>1,991       | 9,384<br>1,828<br>1,901 | 1,736<br>671<br>698          | 862<br>253<br>264 | 715<br>1,305<br>1,358 | 372<br>3,984 |              |
| 1. Food                       | 22<br>93<br>97   | 3,752<br>677<br>704          | 7,517<br>2,384<br>2,479    | 2,600<br>1,111<br>1,155       | 2,090<br>614<br>639        | 196<br>106<br>110             | 1,204<br>200<br>208     | 1,204<br>299<br>311          | 203<br>52<br>54   | 82<br>1,192<br>1,240  | 302<br>2,323 |              |
| 2. Freshwater supply          |                  |                              |                            | 4,240<br>1,217<br>1,266       | 5,189<br>408<br>424        | 5,580<br>1,808<br>1,880       | 875<br>27<br>28         | 455<br>191<br>199            |                   | 602<br>60<br>62       | 50<br>400    |              |
| 3. Raw materials              | 8<br>8           | 16,792<br>21,528<br>22,389   | 32<br>12<br>12             | 1,414<br>358<br>372           | 2,430<br>425<br>442        |                               | 3,273<br>84<br>87       | 54<br>181<br>188             | 659<br>170<br>177 | 31<br>53<br>55        | 21<br>219    |              |
| 4. Genetic resources          |                  | 33,048<br>34,370             |                            | 10<br>10                      |                            |                               | 1,799<br>13<br>14       |                              |                   |                       | 1,042        |              |
| 5. Medicinal resources        |                  |                              |                            | 301<br>313                    | 99<br>103                  |                               | 1,782<br>1,504<br>1,564 | 23                           |                   | 1<br>1                |              |              |
| 6. Ornamental resources       |                  | 348<br>472<br>491            |                            | 35<br>114<br>119              |                            |                               |                         |                              | 32<br>33          |                       |              |              |
| <b>Regulating</b>             | 62<br>65<br>68   | 33,640<br>171,478<br>178,337 | 30,451<br>25,847<br>26,881 | 135,361<br>171,515<br>178,376 | 23,018<br>17,364<br>18,058 | 4,978<br>187<br>194           | 7,135<br>2,529<br>2,630 | 456<br>491<br>512            | 1,088<br>51<br>53 | 2,067<br>159<br>165   | 713<br>970   | 2,331<br>921 |
| 7. Influence on air quality   |                  |                              |                            |                               |                            |                               | 957<br>12<br>12         |                              |                   |                       | 61           | 492          |
| 8. Climate regulation         | 55<br>65<br>68   | 1,188<br>1,236               | 479<br>498                 | 4,677<br>65<br>68             | 351<br>488<br>508          |                               | 761<br>2,044<br>2,126   | 376<br>152<br>158            | 387<br>7<br>7     | 1,661<br>40<br>42     | 95<br>411    | 1,561<br>905 |
| 9. Moderating extreme events  |                  | 33,556<br>16,991<br>17,671   |                            | 9,729<br>5,351<br>5,565       | 4,430<br>2986<br>3,105     |                               | 340<br>66<br>69         |                              |                   |                       |              |              |
| 10. Regulation of water flows |                  |                              |                            |                               | 9,369<br>5606<br>5830      | 194                           | 36<br>342<br>356        | 3                            |                   |                       | 56           | 278<br>16    |

|                                                    |     |           |        |         |        |        |        |       |       |       |       |       |
|----------------------------------------------------|-----|-----------|--------|---------|--------|--------|--------|-------|-------|-------|-------|-------|
| 11. Waste treatment/water purification             |     | 77        |        | 120,200 | 4,280  | 4,978  | 665    | 77    | 701   | 358   | 202   |       |
|                                                    |     | 85        |        | 162,125 | 3015   | 187    | 6      | 7     |       | 75    | 397   |       |
|                                                    |     | 88        |        | 168,610 | 3,316  |        | 6      | 7     |       | 78    |       |       |
| 12. Erosion prevention                             |     | 153,214   | 25,368 | 755     | 2607   |        | 3,211  | 5     | 13    | 47    | 128   |       |
|                                                    |     | 159,343   | 26,383 | 3,929   | 2,711  |        | 15     | 5     | 14    | 44    | 107   |       |
|                                                    |     |           |        | 4,086   |        |        | 16     |       |       | 46    |       |       |
| 13. Nutrient cycling                               |     |           | 30,451 | 45      | 4,588  |        | 1,067  | 93    |       |       | 119   |       |
|                                                    |     |           |        | 47      | 1,713  |        | 3      | 97    |       |       |       |       |
|                                                    |     |           |        |         | 1,782  |        | 3      |       |       |       |       |       |
| 14. Pollination                                    |     |           |        |         |        |        | 99     |       | 31    |       | 33    |       |
|                                                    |     |           |        |         |        |        | 30     |       | 32    |       | 22    |       |
|                                                    |     |           |        |         |        |        | 31     |       |       |       |       |       |
| 15. Biological control                             | 7   | 7         |        |         | 948    |        | 11     | 235   |       |       | 20    |       |
|                                                    |     |           |        |         | 986    |        | 11     | 244   |       |       | 33    |       |
| Habitat                                            | 5   | 56,137    | 164    | 68,795  | 3,471  |        | 5,277  | 2575  | 1,277 | 298   | 101   |       |
|                                                    | 5   | 16,210    | 375    | 17,138  | 2,455  |        | 39     | 862   | 1,327 | 1,214 |       |       |
|                                                    |     | 16,858    | 389    | 17,824  | 2,553  |        | 41     | 896   |       | 1,263 |       |       |
| 16. Life cycle maintenance                         |     |           | 164    | 59,645  | 917    |        | 16     |       | 1,273 |       | 36    |       |
|                                                    |     |           | 194    | 10,648  | 1,287  |        | 17     |       | 1,324 |       |       |       |
|                                                    |     |           | 202    | 11,074  | 1,338  |        |        |       |       |       |       |       |
| 17. Gene pool protection                           | 5   | 56,137    | 180    | 9,150   | 2,554  |        | 5,277  | 2575  | 3     | 298   | 64    |       |
|                                                    | 5   | 16,210    | 187    | 6,490   | 1,168  |        | 23     | 862   | 3     | 1,214 |       |       |
|                                                    |     | 16,858    |        | 6,750   | 1,215  |        | 24     | 896   |       | 1,263 |       |       |
| Cultural                                           | 319 | 1,084,809 | 41,416 | 2,904   | 8,399  | 2,733  | 1,426  | 96    | 7     | 11    | 19    | 2,469 |
|                                                    | 332 | 108,837   | 300    | 2,193   | 4,203  | 2,166  | 867    | 990   | 7     | 193   | 82    | 5,740 |
|                                                    |     | 113,190   | 311    | 2,281   | 4,371  | 2,253  | 902    | 1,030 |       | 27    |       |       |
| 18. Aesthetic information                          |     | 27,317    |        |         | 3,906  |        |        |       |       | 167   | 15    | 2,016 |
|                                                    |     | 11,390    |        |         | 1,292  |        |        |       |       | 174   |       |       |
|                                                    |     | 11,846    |        |         | 1,344  |        |        |       |       |       |       |       |
| 19. Recreation and tourism                         | 319 | 1,057,492 | 41,416 | 2,904   | 3,700  | 2,733  | 1,426  | 96    | 7     | 11    | 4     | 453   |
|                                                    | 332 | 96,302    | 256    | 2,193   | 2,211  | 2,166  | 867    | 989   | 7     | 26    | 82    | 5,740 |
|                                                    |     | 100,154   | 266    | 2,281   | 2,299  | 2,253  | 902    | 1,029 |       | 27    |       |       |
| 20. Inspiration (art, design)                      |     |           |        |         | 793    |        |        |       |       |       |       |       |
|                                                    |     |           |        |         | 700    |        |        |       |       |       |       |       |
|                                                    |     |           |        |         | 728    |        |        |       |       |       |       |       |
| 21. Spiritual                                      |     |           | 21     |         |        |        |        |       |       |       |       |       |
|                                                    |     |           | 22     |         |        |        |        |       |       |       |       |       |
| 22. Cognitive development (education and research) |     | 1,145     | 22     |         |        |        |        | 1     |       |       |       |       |
|                                                    |     | 1,191     | 23     |         |        |        |        | 1     |       |       |       |       |
| Total Economic                                     | 84  | 1,195,478 | 79,580 | 215,349 | 44,597 | 13,487 | 23,222 | 4,863 | 1,950 | 3,091 | 1,205 | 4,800 |

|                                            |            |                    |                  |                    |                  |                |                |                |                |                |       |       |
|--------------------------------------------|------------|--------------------|------------------|--------------------|------------------|----------------|----------------|----------------|----------------|----------------|-------|-------|
| Value (Total of<br>Service Mean<br>Values) | 491<br>511 | 352,249<br>366,339 | 28,918<br>30,073 | 193,844<br>201,598 | 25,681<br>26,708 | 4,267<br>4,438 | 5,264<br>5,474 | 3,013<br>3.135 | 1,588<br>1,652 | 2,871<br>2,986 | 5,036 | 6,661 |
|--------------------------------------------|------------|--------------------|------------------|--------------------|------------------|----------------|----------------|----------------|----------------|----------------|-------|-------|

\*Black (source: [7]), Red (source: [59]), Blue (source: [82]), Green (source: [14])
