# Supplementary material
Source: MDPI journal article supplement (https://www.mdpi.com/2071-1050/9/5/850)
Supplement: s1 [file s1]

**Table S3.** Summary of global ES flows, adapted from [82]

| Biome                                              | Total global value<br>(Int.US\$/yr × 10 <sup>9</sup> ) |
|----------------------------------------------------|--------------------------------------------------------|
| <i>Terrestrial</i>                                 | 37,178                                                 |
| Croplands                                          | 1,195                                                  |
| • Mixed croplands (60% croplands, 40% vegetation)  | 1,729                                                  |
| • Mixed croplands (40% croplands, 60% vegetation)  | 2,240                                                  |
| Tropical Forest                                    | 6,147                                                  |
| Temperate Forest                                   | 8,777                                                  |
| Mixed tropical and temperate forest                | 1,819                                                  |
| Woodlands                                          | 4,754                                                  |
| Grasslands                                         | 2,470                                                  |
| • Mixed woodlands (60% woodlands, 40% grasslands)  | 1,345                                                  |
| • Mixed grasslands (60% grasslands, 40% woodlands) | 1,345                                                  |
| Inland Wetlands                                    | 3,193                                                  |
| Freshwater (lakes and rivers)                      | 1,436                                                  |
| Urban areas                                        | 8                                                      |
| <i>Marine</i>                                      | 112,431                                                |
| Marine/ Open Ocean                                 | 26,736                                                 |
| Open Ocean                                         | 16,385                                                 |
| Coral reefs                                        | 10,351                                                 |
| Coastal systems                                    | 85,595                                                 |
| Seagrass/Algal beds                                | 1,504                                                  |
| Shelf sea                                          | 119,675                                                |
| Estuarine/Shore                                    | 3,167                                                  |
| Coastal wetlands                                   | 3,060                                                  |
| <b>Total</b>                                       | <b>149,609</b>                                         |
